# Supplementary material for: In-vivo Imaging of Magnetic Fields Induced by Transcranial Direct Current Stimulation (tDCS) in Human Brain using MRI
Source: PubMed Central journal article supplement (PMC5048181; doi:10.1038/srep34385), 2016-10-04
Supplement: srep34385-s1.pdf [file srep34385-s1.pdf]

## *Supplemental Materials Online*

### **In-vivo Imaging of Magnetic Fields Induced by Transcranial Direct Current Stimulation (tDCS) in Human Brain using MRI**

Mayank V Jog, Robert X Smith, Kay Jann, Walter Dunn, Belen Lafon, Dennis Truong, Allan  
Wu, Lucas Parra, Marom Bikson, Danny JJ Wang\*

#### **S1: Detection Limit of the Proposed Technique**

*Equation (2)* in main text can be rewritten as:

$$\Delta B_z = \frac{\Delta \Phi_m}{\gamma \times \Delta TE} \quad (S1)$$

where the quantities are as those defined in *Equation (2)*, and  $\Delta$  represents the fact that we are considering the phase difference between two TE's (The phase difference is utilized in actual analyses, since it removes a confound, see *Supplemental S5*). The modulo- $2\pi$  operation has been removed reflecting the fact that the phase angles have been unwrapped. In an ideal scenario without noise, the minimum (unbiased) detectable field corresponds to the smallest possible non-zero phase change generated by the smallest applied current (0.5mA). Because the full phase range of 0 to  $2\pi$  radians is divided into 4096 discrete levels in MRI, the smallest non-zero phase change evaluates to  $\left(\frac{2\pi}{4096}\right)$  radians. Together with the experimental parameter  $\Delta TE$  (chosen as 9.84 msec for all our experiments), the minimum (unbiased) detectable field equates to 0.58nT at 0.5mA, or  $\sim 1.2\text{nT/mA}$ . It should be noted that this detection limit is specific to the present implementation. In other words, it is possible to lower this limit using a larger  $\Delta TE$ , and to some extent, different applied currents. A larger  $\Delta TE$  can be achieved by minimizing  $TE_1$ , or, increasing  $TE_2$  permitted by SNR.

23

## 24 **S2: MRI is only sensitive to magnetic field disturbances along $B_z$**

25 Here we show why MRI is only sensitive to magnetic field disturbances along the static  
26 magnetic field ( $B_z$ ). Any perturbation of the magnetic field ( $\Delta\vec{B}$ ) can be written as a sum of two  
27 orthogonal components: one along  $B_z$ , and the other perpendicular to  $B_z$  (indicated by  $(\Delta B_{\parallel})\widehat{B}_z$   
28 and  $(\Delta B_{\perp})\widehat{B}_{\perp,z}$  respectively).

29 The total magnetic field can be written as a vector sum of  $B_z$  and the perturbation:

$$30 \quad \vec{B}_{total} = (B_z + \Delta B_{\parallel})\widehat{B}_z + (\Delta B_{\perp})\widehat{B}_{\perp,z} \quad (S2)$$

31 or equivalently, as a vector of length  $B_{mag}$ , at an angle  $\theta$  to  $\widehat{B}_z$ :

$$32 \quad B_{mag} = \sqrt{(B_z + \Delta B_{\parallel})^2 + (\Delta B_{\perp})^2} \quad ; \quad \theta = \tan^{-1}\left(\frac{\Delta B_{\perp}}{B_z + \Delta B_{\parallel}}\right) \quad (S3)$$

33 For perturbations on the order of ppm, it can be seen that  $\theta$  is almost zero i.e.,  $\vec{B}_{total}$  is along  $\widehat{B}_z$ .

34 Under the same ppm perturbations,  $B_{mag}$  can be approximated using the Taylor Series expansion

35 as

$$36 \quad B_{mag} \cong B_z + \Delta B_{\parallel} + \frac{B_z}{2} \left\{ \left(\frac{\Delta B_{\parallel}}{B_z}\right)^2 + \left(\frac{\Delta B_{\perp}}{B_z}\right)^2 \right\} + \dots \quad (S4)$$

37 Relative to  $\Delta B_{\parallel}$ , the contribution of  $\Delta B_{\perp}$  is on the order of ppm (since it is scaled by a factor of

38  $B_z^{-1}$ ) and can thus be neglected. Thus, it can be said that (1) the magnetic field deviations

39 measured by MRI field mapping reflect  $\Delta B_{\parallel}$ , i.e. the component of the field disturbances

40 along  $\widehat{B}_z$  and (2) the resultant field is along the MRI static field ( $\because \theta \approx 0$ ).

41

## 42 **S3: Simulations of Phantom Experiment**

43 In the phantom experiment, the current density at each point of the current carrying tube can be

44 estimated. In such a special case involving known DC current densities, the Biot-Savart law can  
45 be used to calculate current-induced magnetic fields (*Equation (3)* in main text).

46

47 An implementation of the Biot-Savart law for line currents (33) was modified in-house and  
48 extended to volumetric finite element currents. The implementation of the finite element  
49 simulation was carried out in two steps:

50 1. Magnetic field estimation:

51 Magnetic fields (along  $B_z$ ) were estimated over a grid (henceforth referred to as the ‘Sampled  
52 grid’, *Supplemental Fig. S2(a)*) designed to match the spatial resolution of the MRI phantom  
53 experiment  $\Delta x \times \Delta y \times \Delta z = 2 \times 2 \times 3 \text{ mm}^3$ . It should be noted that while MRI  
54 measurements represent the average magnetic field in a voxel, magnetic fields calculated  
55 using the Biot-Savart law estimate the field at a point and hold no information about the  
56 neighborhood. To address this, the magnetic field at each point on the sampled grid was  
57 calculated as an average over fields calculated on a 3D ‘super-sampled’ grid (*Supplemental*  
58 *Fig. S2(b)*, shown as 2D for simplicity). The spatial resolution of the 3D super-sampled grid  
59 was 0.5 mm isotropic and the magnetic field value at each point was calculated using the  
60 Biot-Savart Law (*Equation (3)* in main text).

61

62 2. Electric Current modeling:

63 Assuming the salt-water electrolyte to be isotropic with uniform conductivity, the electric  
64 current is expected to travel in parallel ‘streamlines’ between the electrodes. Utilizing the  
65 inherent symmetries in the system, these streamlines were discretized to a non-Cartesian grid  
66 as shown in *Supplemental Fig. S2(c)*. The discretized grid had a spatial resolution of

67 ~0.125mm isotropic. In other words, at least 64 points would be enclosed by a volume with  
68 the size of a single voxel on the super-sampled grid (discussed in 1 above).

69

70 Each streamline is an electric current flowing through an ohmic resistor. Thus, the system is  
71 electrically equivalent to a current-divider circuit (shown in *Supplemental Fig. S2(d)*), with  
72 each branch of the circuit representing a streamline and the input being the total applied  
73 current. The resistance of each branch is equal to the resistivity of the electrolyte multiplied  
74 by the ratio of the length of the streamline to its cross-sectional area. While the length of a  
75 particular streamline is known from phantom geometry, the cross-sectional area is  
76 determined during the discretization process. The circuit was solved to compute the current  
77 through each streamline by choosing the total applied current to be 1mA. It should be noted  
78 that the resistivity of the electrolyte is not needed for this calculation. The choice of 1mA  
79 enabled direct comparison between the simulated fields and those detected using MRI (the  
80 latter being the induced magnetic fields per unit mA applied-current). The average current  
81 density within the conducting tube 'A' was  $0.79 \text{ mA/cm}^2$  (1mA,  $\frac{1}{2}$  inch tube diameter).

82

#### 83 **S4: Simulations of Limb Experiment (Calf)**

84 Laplace's equation governs the voltage distribution in a purely resistive volume during constant  
85 current flow. The calf structural MR images were segmented into compartments representing the  
86 gel, skin, fat, muscle and bone using a combination of automated and manual segmentation  
87 routines (17). The stimulation electrodes were imported as CAD models and positioned within  
88 the image data. Volumetric meshes were subsequently generated from the compartments  
89 (SIMPLEWARE Ltd, Exeter, UK) and imported to a commercial finite element solver

90 (COMSOL Inc, MA, USA). Isotropic conductivity values were used (electrode:  $5.99 \times 10^7$ , gel: 1.4  
91 S/m, skin: 0.465, fat: 0.001, muscle: 0.16, bone: 0.01) and the Laplace equation was solved to  
92 generate a spatial map of current density. The conductivity values used have been previously  
93 reported in (34) (skin and bone) and (35)(muscle and fat).

94

95 The Biot-Savart law (*Equation 3* in main text) was used to calculate magnetic field due the  
96 calculated static current densities. The Biot-Savart law was implemented as a 3D convolution, as  
97 previously reported in (21).

98

## 99 **S5: Experimental Procedures**

### 100 ***Concurrent tDCS-MRI***

101 An MRI compatible tDCS system was constructed to enable concurrent tDCS-MRI experiments.  
102 Quad-shielded coaxial cables were used to carry the applied current from the tDCS stimulator  
103 (kept in the MRI control room) to the electrodes (in the scanner room). The battery-powered  
104 “ActivaDose Iontophoresis Delivery Unit” (ActivaTek, Salt Lake City, UT) was used to drive  
105 the current. Similar to (13), a filter box and in-line resistors of 10k-ohm were installed at the  
106 stimulator and electrode ends respectively to provide protection from potential voltage  
107 fluctuations due to gradient switching during MRI scans.

108

### 109 ***Experiments***

#### 110 **A. Phantom:**

111 The phantom was constructed in three parts –

112 (i) Bulk phantom: A standard Siemens cylindrical phantom ( $3.75\text{g NiSO}_4 \times 6\text{H}_2\text{O} + 5\text{g NaCl}$  per

113 1000gm H<sub>2</sub>O, 0.5 Gallon, 10.6 cm diameter) was used. Available in a sealed plastic container,  
114 the contents are insulated from external currents.

115 (ii) Current-Carrying tube (Tube 'A', **Fig. 1a**): A flexible plastic tube (ID=1/2 inch) was bent  
116 into a U-shape and wrapped around the long axis of (i) at its midline. The tube was filled with  
117 salt water (electrolyte), and fitted with copper electrodes at both ends. The electrodes were  
118 connected to the tDCS stimulator. All applied currents travel through this tube.

119 (iii) 'Control' Tube (Tube 'B', **Fig. 1a**): A second plastic tube (ID=3/8 inch) constructed using  
120 the same material and electrolytes, was placed similar to (ii) at the distal end of (i). This tube was  
121 designed to serve as an intra-session control and accordingly, the electrodes were not connected  
122 to the tDCS stimulator.

123

124 B. Calf:

125 Round carbon rubber electrodes (2" inch diameter) were secured laterally on each side of the left  
126 calf. Conductivity gel (Cadwell, P/N# 202153-000) was used to make electrical contacts.

127

128 C. Head:

129 Sponge electrodes were placed bilaterally over the C3/C4 position (anode C4 and cathode C3),  
130 according to the international 10/20 system to target the motor cortices. The electrodes were  
131 rectangular (4.5x9cm) in shape with their long axes in A $\leftrightarrow$ P direction. The same conductivity  
132 gel as the calf experiment (Cadwell, P/N# 202153-000) was used to make electrical contacts.

133

#### 134 ***Data Acquisition***

135 MRI data were acquired using a product single channel Tx/Rx quadrature volume coil. The

136 phantom and calf data were acquired on a Siemens 3T PRISMA system, while the head data  
137 were acquired on a Siemens 3T Trio TIM system. It should be noted that MRI shimming was  
138 performed only once at the start of each session. Shimming is a pre-scan preparatory step that  
139 corrects for field deviations from  $B_z$  and may cancel out current induced fields. Potentially  
140 uncorrected field deviations, unrelated to electrical current, were explicitly modeled out (see  
141  $\Phi_{\text{drift}}$  below).

142

### 143 *Pre-Processing*

144 Stochastic noise in a single voxel of the phase image is approximately zero-mean Gaussian for  
145 (magnitude) SNR  $\geq 3$  (36). A Gaussian noise is necessary for phase unwrapping as well as for  
146 GLM modeling of the preprocessed data (especially since at the other extreme of SNR=0, voxel  
147 noise in the phase image is uniformly distributed). The threshold of 3 is mathematically  
148 equivalent to a p-value (since the distribution of the noise is known). This p-value threshold was  
149 adjusted (Bonferroni corrected) to account for the total number of voxels being tested, and  
150 voxels under the threshold were excluded.

151

152 Thresholded phase data was unwrapped using the Region growing algorithm implemented in the  
153 PhaseTools toolbox (37) (available as a plug-in for Fiji (38)). Unwrapping was carried out at the  
154 individual volume level, followed by unwrapping within each slice. Using SPM8, volumes were  
155 then realigned to the first (volume) to account for inter-scan motion. The realignment parameters  
156 were estimated using the magnitude data from the first echo ( $TE_1$ ). The realignment step was  
157 skipped for the phantom.

158

159 ***Model for Measured Phase***

160 Measured phase was modeled as:

161 
$$\Phi_m = \Phi_{Current}(TE, i(s)) + \Phi_0(s) + \Phi_{Non-Current}(TE) + \Phi_{drift}(TE, s) + \Phi_{noise} \quad (S5)$$

162 where  $\Phi_m$  is the measured phase,  $\Phi_{Current}$  is the phase due to current-induced fields,  $TE$  is the  
163 echo-time, “ $s$ ” refers to the fact that the data is from the  $s^{th}$  scan in the current session and  $i(s)$  is  
164 the current applied during the “ $s$ -th” scan.  $\Phi_0$  is the baseline phase,  $\Phi_{Non-Current}$  is the phase due to  
165 field deviations unrelated to applied current but steady between scans (eg. off-resonance),  $\Phi_{drift}$  is  
166 the phase due to inter-scan field-deviations caused by the time-varying drift of the main magnetic  
167 field and  $\Phi_{noise}$  is the phase due to (Gaussian) noise.

168

169 The phase difference ( $\Delta\Phi_m$ ) between the two TEs was computed. This step eliminates  $\Phi_0$ .  $\Delta\Phi_m$   
170 was subsequently included as the dependent variable in a general linear model (GLM) with  
171 applied current ( $i(s)$ ) as the predictor. This is based on the assumption that the current path  
172 remains the same for all applied currents.  $\Delta\Phi_{Non-Current}$  by definition does not vary with applied  
173 current and is implicitly incorporated into the GLM intercept.

174

175 On the other hand,  $\Delta\Phi_{drift}$  was explicitly modeled by a polynomial function that was fitted least  
176 squares wise to phase measured during zero-current scans. This is consistent with the model for  
177 measured phase (***Equation (S5)***) wherein the phase fluctuations for zero-current scans should be  
178 purely due to drift and noise. The degree ( $d^*$ ) of the polynomial was selected to optimally match  
179 the characteristics of the residual with those of  $\Phi_{noise}$  to prevent overfitting.  $\Phi_{noise}$  for each voxel  
180 was estimated using the magnitude image (36).



181

182 The regression coefficient for applied current ( $\beta_{\text{Current}}$ ) obtained from the GLM analysis can be  
183 interpreted as the phase gained per 1mA applied-current. This was converted to induced  
184 magnetic field per mA current using *Equation (2)*. Obtained mA-current induced magnetic field  
185 maps were subsequently thresholded at  $p < 0.05$  and cluster corrected (using AlphaSim (39))  
186 following standard statistical procedures for fMRI.

187

### 188 ***Group Level Analyses***

189 Current-induced field maps of individual subjects were coregistered to the corresponding  
190 structural images and subsequently normalized to the MNI space using SPM8. Normalized field  
191 maps were used to perform a one-sample t-test for both ‘Active’ and ‘Sham’ sessions. Results  
192 were thresholded at  $p < 0.05$  and cluster corrected for multiple comparisons using AlphaSim (39).

193

### 194 ***Region-of-interest (ROI)-Analysis***

195 ROIs were constructed as spheres with a radius of 1cm centered at projections of C3/C4 on the  
196 cortex (as reported by (23)), thresholded to exclude all out of brain voxels. Each ROI enclosed  
197 equal number of voxels (178).  $\Delta\Phi_{\text{Current}}$  within each ROI was averaged over all voxels, and was  
198 used in a linear fit with applied current as the predictor. The slope of such a fit can be interpreted  
199 as the ROI-averaged current-induced field. These were subsequently used to perform a one-  
200 sample t-test for both ‘Active’ and ‘Sham’ sessions. Significant current induced magnetic fields  
201 were observed for the ‘Active’ session, both at C3 and C4 (corresponding to Cathode and Anode  
202 respectively). No fields were observed for the ‘Sham’ session (See *Supplemental Fig. S1*).  
203 Additionally, the field changes under anode and cathode had the same sign; which is intuitive

204 given that the direction of tDCS current flow is the same (from anode to cathode) at both  
205 electrodes. Note that the sign of the fields matches that of the results obtained through voxel-  
206 wise analysis.

207

## 208 **S6: Ampere's Law for Biological Tissues**

209 The general form of Ampere's Law is:

$$210 \quad \nabla \times \vec{H} = \vec{j} + \frac{\delta}{\delta t} \vec{D} \quad (S6)$$

211 where  $\vec{H}$  is the magnetizing field,  $\vec{j}$  is the applied current,  $\vec{D}$  is the displacement field,  $t$  is time  
212 and  $\nabla$  is the curl operator. The time-varying term can be ignored for our DC case. Our  
213 experiment consists of applying a current to biological tissues, which induces magnetic field  
214 perturbations  $\leq \mu\text{T}$  around a 3T static field ( $B_0$ ) of the MRI. Under these conditions, it is  
215 appropriate to replace  $\vec{H}$  according to

$$216 \quad \vec{B} = \mu \vec{H} \quad (S7)$$

217 where  $\vec{B}$  is the induced magnetic field, and  $\mu$  is the magnetic permeability of the biological tissue  
218 (26). Under the same conditions,  $\mu$  is reported to be a scalar, varying on the order of ppm  
219 between tissues (26). By using *Equation (S7)* in *Equation (S6)*, *Equation (1)* in main text can be  
220 derived. A key point to note is that for the reported tissue  $\mu$ , the relationship between applied  
221 current  $\vec{j}$  and induced magnetic field  $\vec{B}$  is linear. Note that the linearity relationship holds even if  
222  $\mu$  is a tensor. In fact, the independence of  $\mu$  from  $\vec{B}$  or  $\vec{H}$  is a sufficient condition for linearity to  
223 hold.

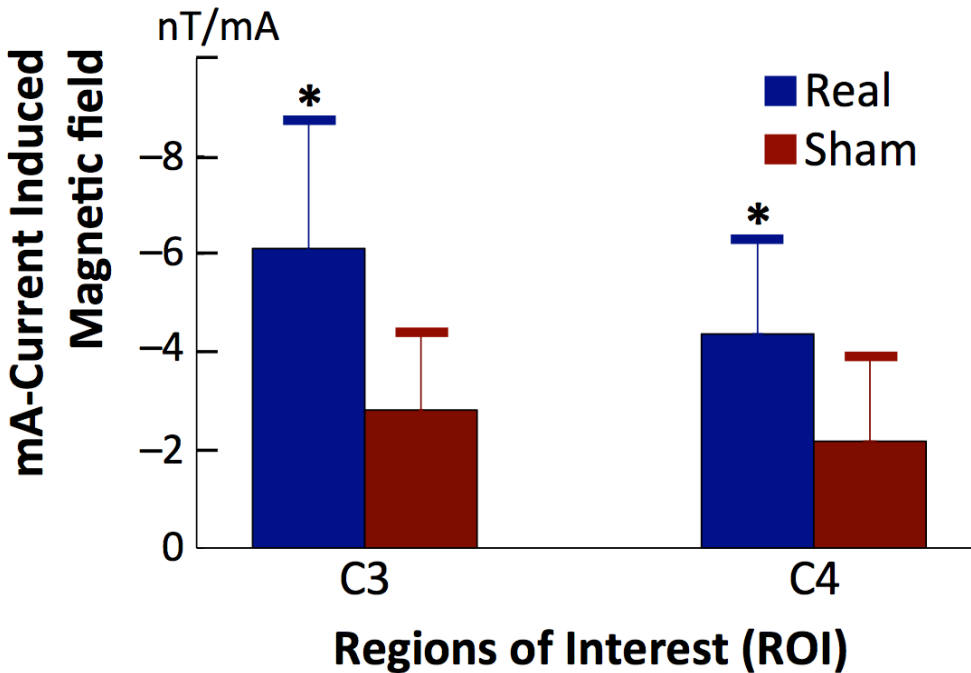

227 **Figure S1:** Results of one-sample t-test performed on ROI-averaged current-induced field.

228 Significant current-induced magnetic field reductions were detected at the C3 and C4 ROIs for

229 the ‘Active’ session ( $\beta = -6.1$  nT/mA,  $-4.4$  nT/mA;  $p = 0.036, 0.044$  respectively;  $N = 12$

230 subjects). No significant fields were detected for the ‘Sham’ session ( $\beta = -2.8$  nT/mA,  $-2.2$

231 nT/mA;  $p = 0.104, 0.233$  respectively). Also shown are error bars for the one-sample t-tests. See

232 *Supplemental S5* for detailed methods for ROI analysis.

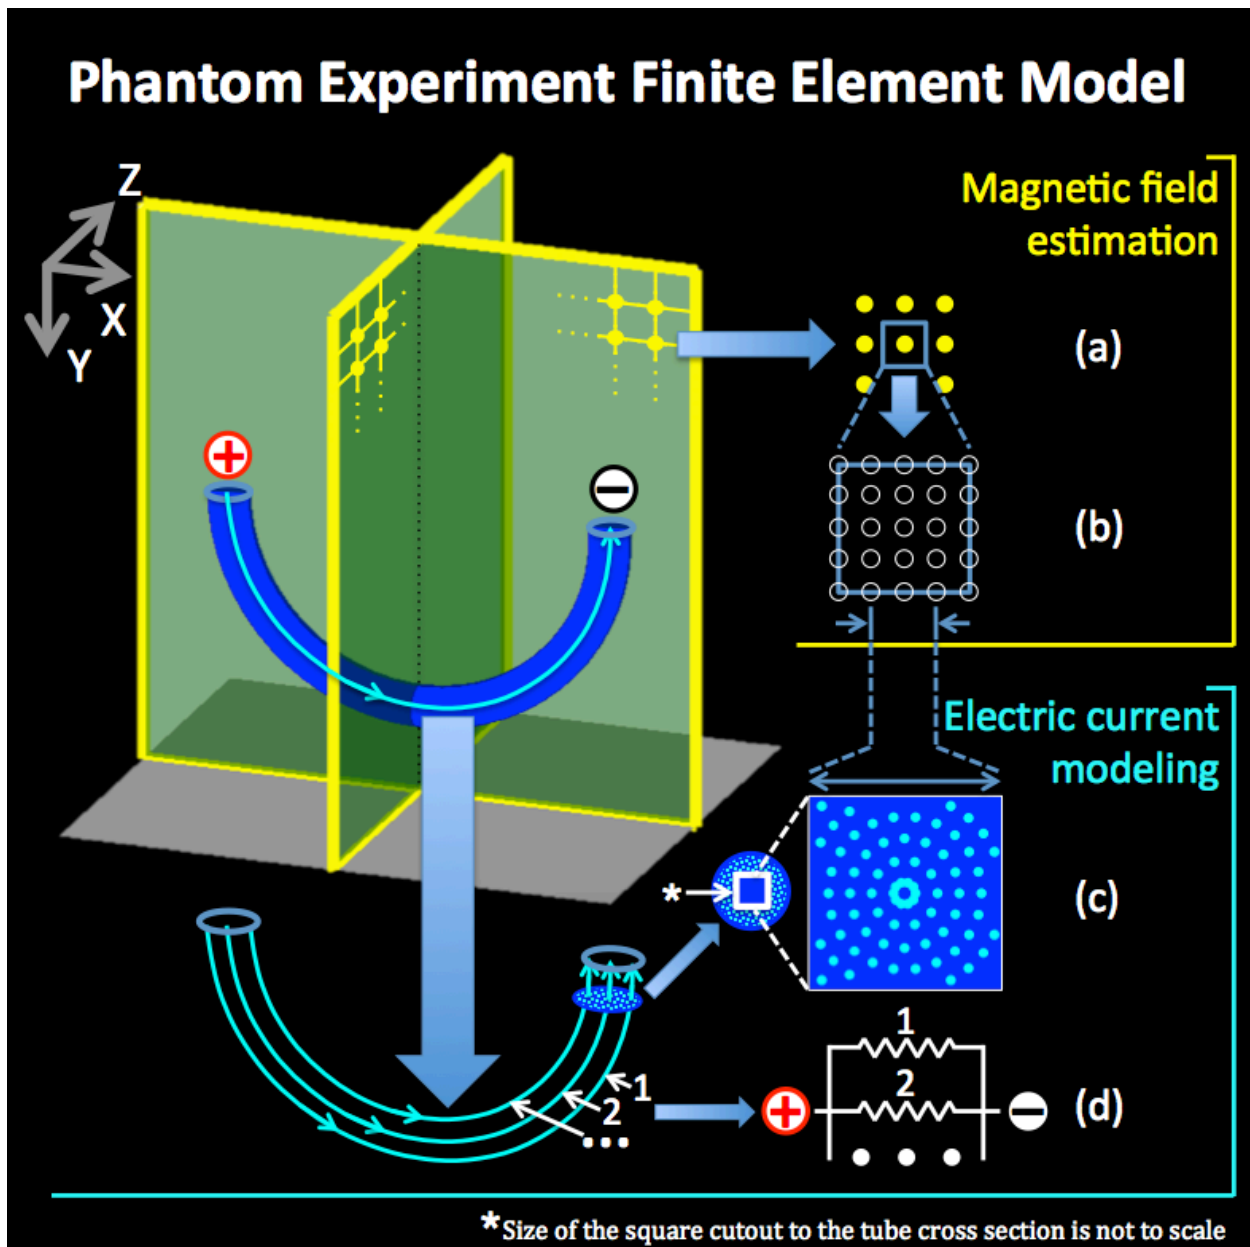

233

234 **Figure S2:** Finite Element modeling of the phantom experiment: (a) shows the grid where the  
 235 magnetic field was calculated as an average over points on a ‘super-sampled’ grid (b), to emulate  
 236 the fact that MRI measures the average behavior in a voxel. The applied current was modeled as  
 237 streamlines, which were subsequently discretized as shown in (c). Current through each  
 238 streamline was calculated from the equivalent circuit as depicted in (d)

239
